# Supplementary material for: Two-dimensional CaFCl: ultra-wide bandgap, strong interlayer quantum confinement, and n-type doping
Source: Royal Society of Chemistry journal article supplement (doi:10.1039/d0cp02804e), 2020-01-01
Supplement: d0cp02804e1.pdf [file d0cp02804e1.pdf]

## Supplementary Information

### **Two-dimensional CaFCl: Ultra-wide bandgap, strong interlayer quantum confinement, and n-type doping**

Xiao-Juan Ye<sup>†</sup>, Zhen-Xue Zhu<sup>†</sup>, Lan Meng, and Chun-Sheng Liu<sup>\*</sup>

College of Electronic and Optical Engineering, Nanjing University of Posts and Telecommunications, Nanjing 210023, China

---

<sup>\*</sup> To whom correspondences should be addressed, E-mail: cslu@njupt.edu.cn

<sup>†</sup> The first two authors contributed equally to this work.

## I. The band structure under uniaxial strains

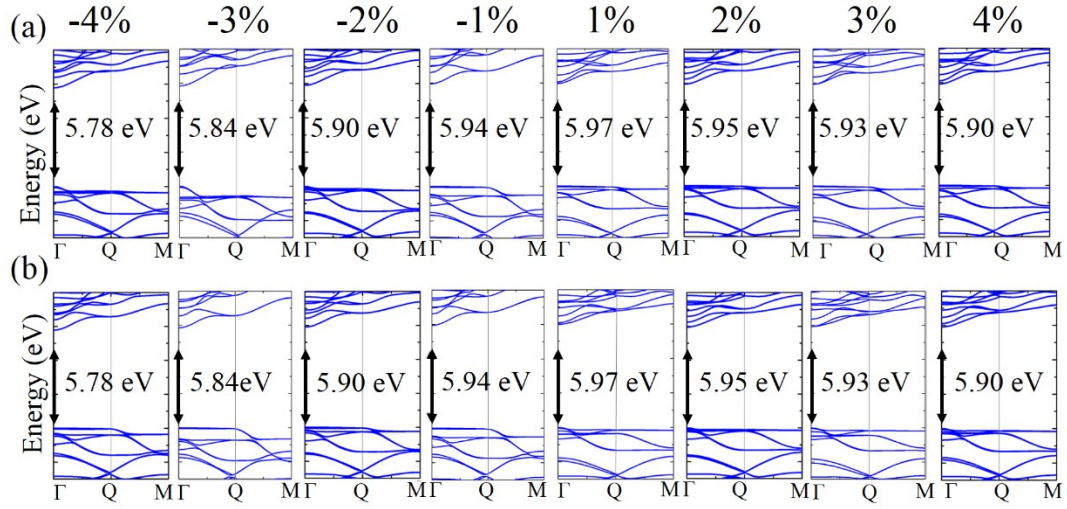

**Fig. S1.** The band structures of monolayer CaFCl under uniaxial strains along (a)  $a$  and (b)  $b$  directions.

## II. PDOS under uniaxial strains

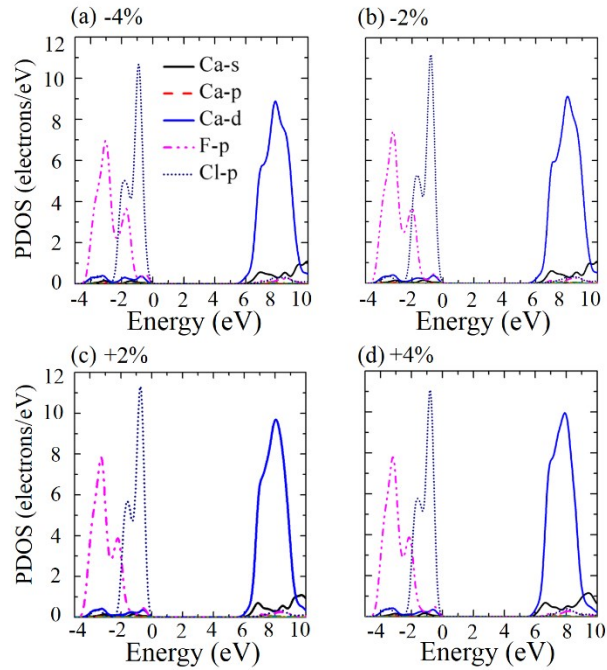

**Fig. S2.** The PDOS of monolayer CaFCl under -4%, -2%, 2%, and +4% uniaxial strains.

### III. The band structure under biaxial strains

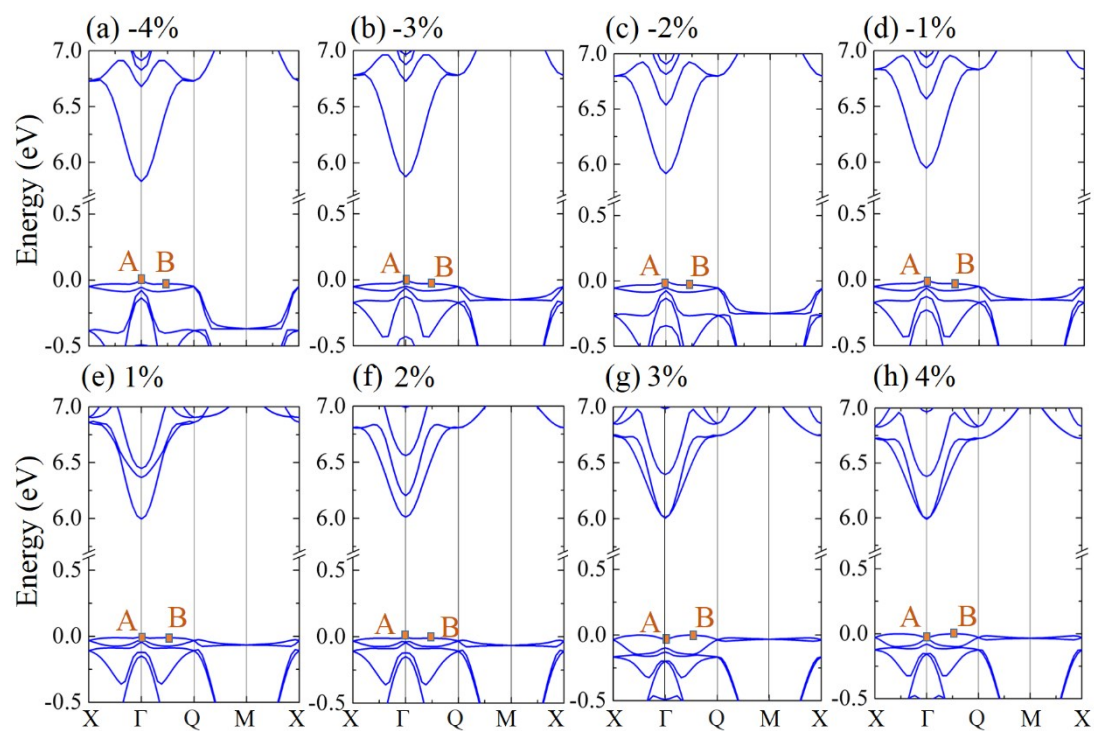

**Fig. S3.** The band structures of monolayer CaFCl under different biaxial strains.

#### IV. The relaxed structures of TTF/CaFCl

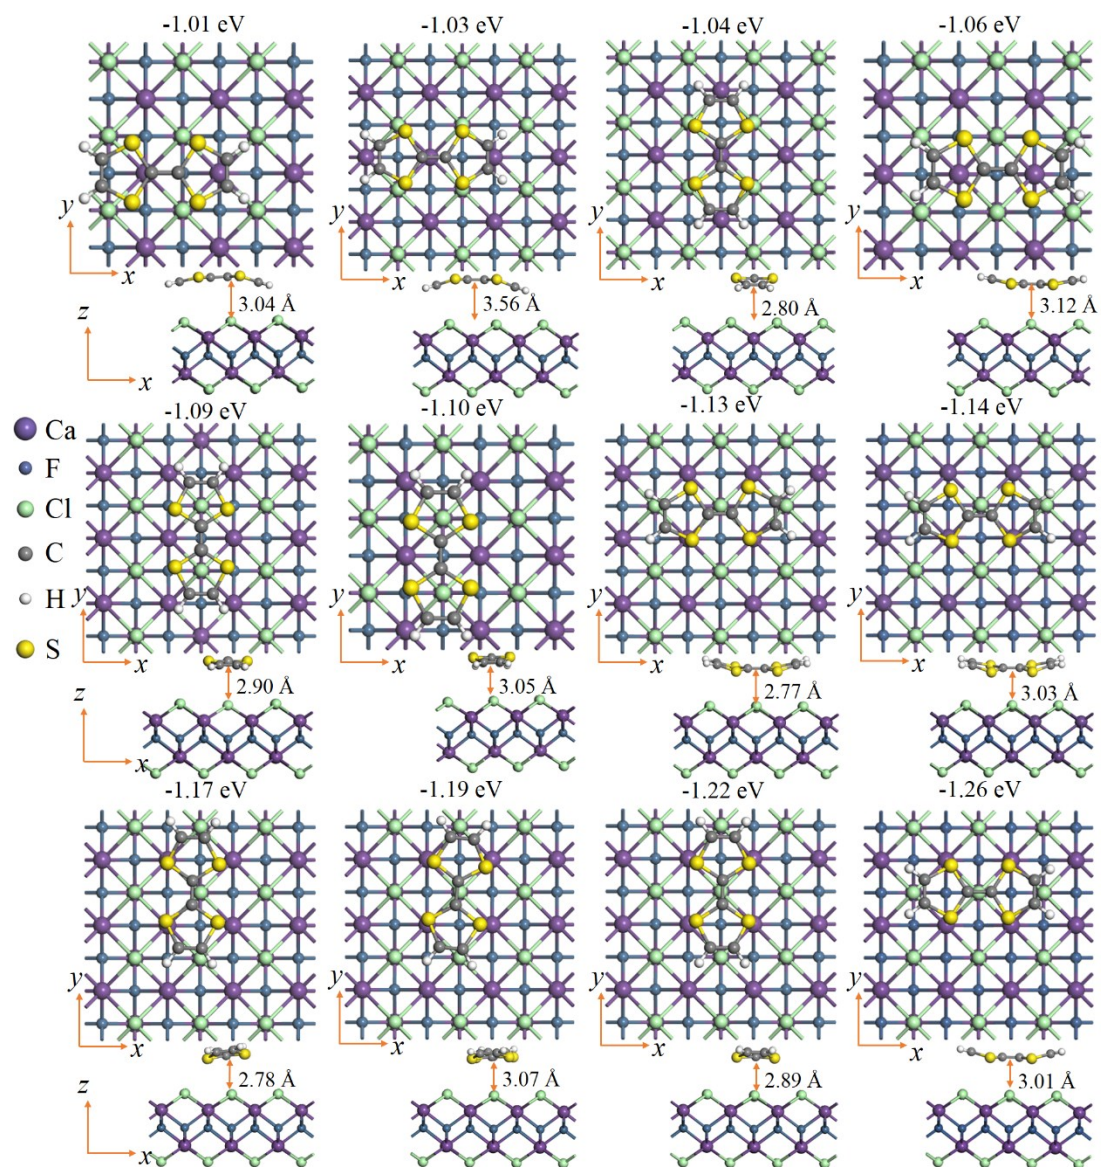

**Fig. S4.** Top and side views of optimized structures for TTF interacting with CaFCl monolayer. The adsorption energies and heights between the molecule and the CaFCl monolayer are also illustrated.

## V. Computation detail of the minimum vertical distance

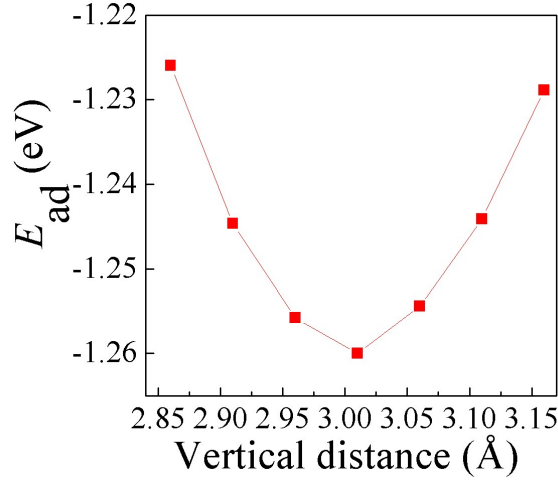

**Fig. S5.** Relative adsorption energies of the most stable configuration for TTF/CaFCl as a function of the vertical distance.

## VI. The highest occupied molecular orbital of the TTF/CaFCl system

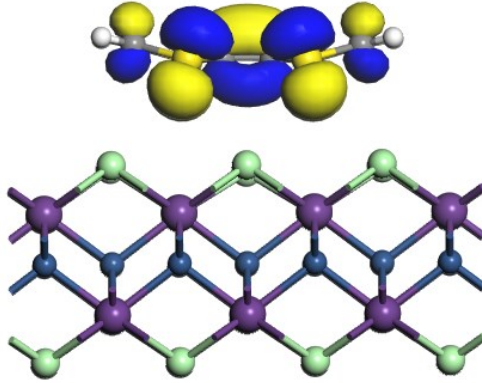

**Fig. S6.** The highest occupied molecular orbital of TTF/CaFCl at  $\Gamma$  point. The isovalue is set to 0.03  $\text{\AA}^{-3}$ .

## VII. Computation detail of in-plane Young's modulus ( $Y_{2D}$ )

The in-plane Young's modulus along  $a$  or  $b$  can be derived from  $\frac{\Delta E}{S_0} = Y_D \frac{(\Delta l / l_0)^2}{2}$ ,

where  $\Delta E$  is the total energy difference under each strain, and  $S_0$  is the lattice area of monolayer CaFCl. We use  $\Delta l / l_0$  ranging from -1.5% to 1.5% to fit the value of  $Y_{2D}$  (Fig.

S7).

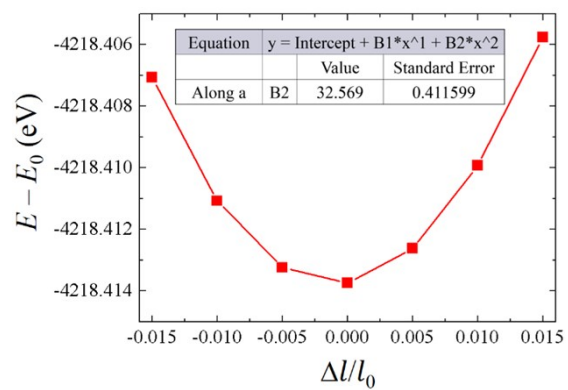

**Fig. S7.** In-plane Young's modulus of monolayer CaFCl along  $a$  direction. The fitted curve along  $b$  direction is consistent with that along  $a$  direction.
